# Supplementary material
Source: Springer Nature journal article supplement (https://www.springermedizin.de/resource/supplementary/13054_2012_1678_MOESM2_ESM.pdf/9711218)

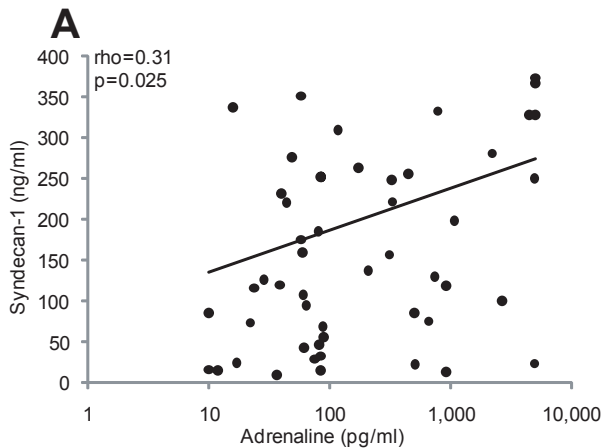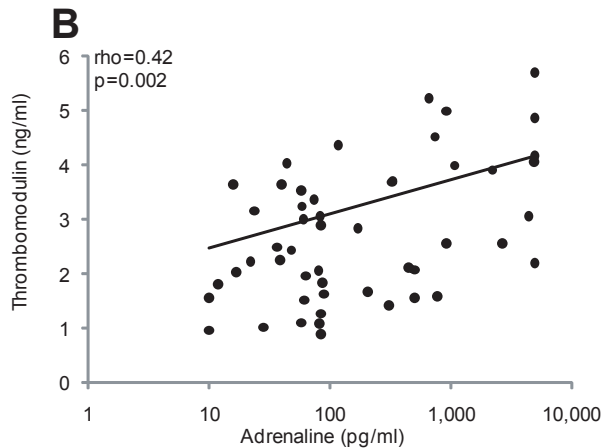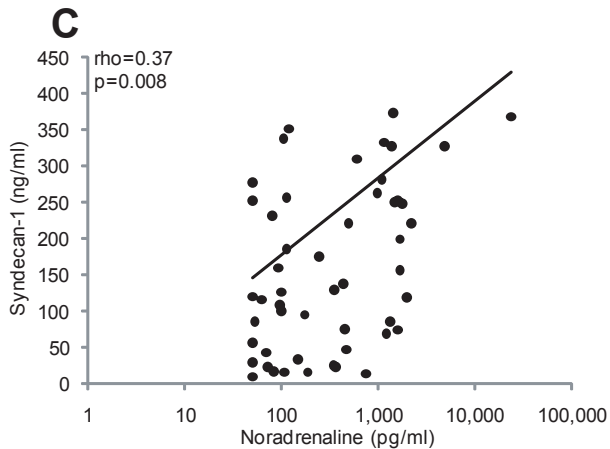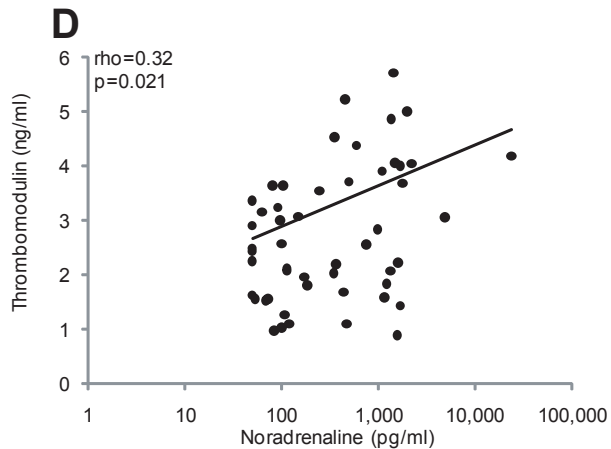

Supplement: MOESM2 [file 9711218]
